# Supplementary material
Source: HighWire-hosted journal article supplement (doi:10.1101/rna.073858.119)

## Supplemental\_Figure\_S1

**Specificity of anti-dsRNA antibody J2. A)** Immunoblot on synthetic dsRNA of varying sizes (500ng); **B)** synthetic analog of dsRNA – poly(I:C) (Invivogen); dsRNA ladder (New England Biolabs); ssRNA ladder (New England Biolabs) with J2 antibody (1:5000; Scicons). **C)** Standard curve showing the relationship between known concentration of dsRNA control poly(I:C) and background-subtracted dot intensities (arbitrary unit (AU)). The standard curve was used to semi-quantitate the amount of dsRNA present in *in vitro* transcription reactions with CLuc template when reactions were performed with either wild-type or TsT7-1 RNA polymerase at 37°C or 50°C. 2µg of total RNA was loaded for each sample.

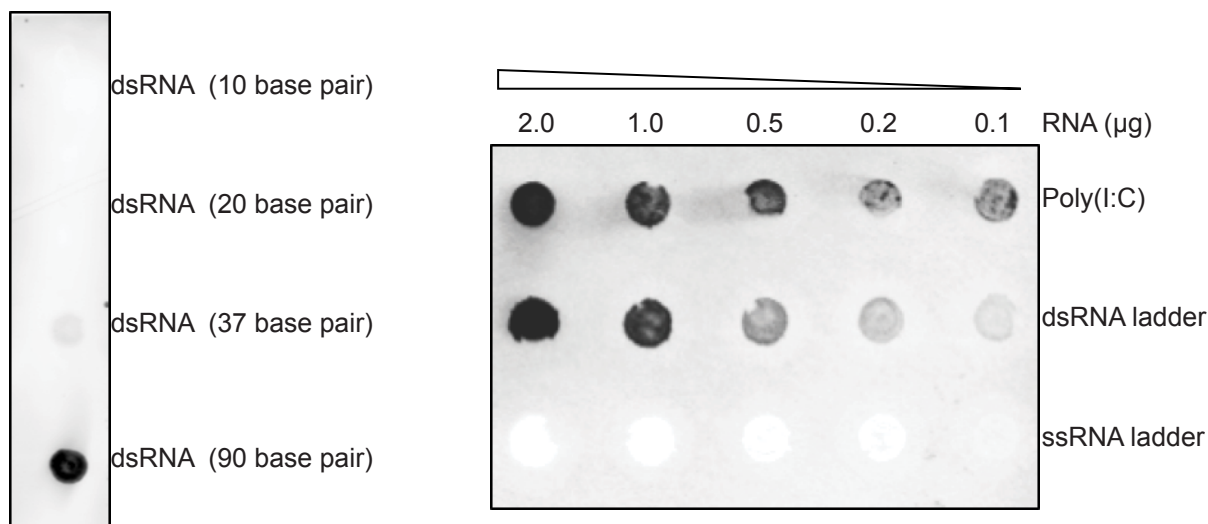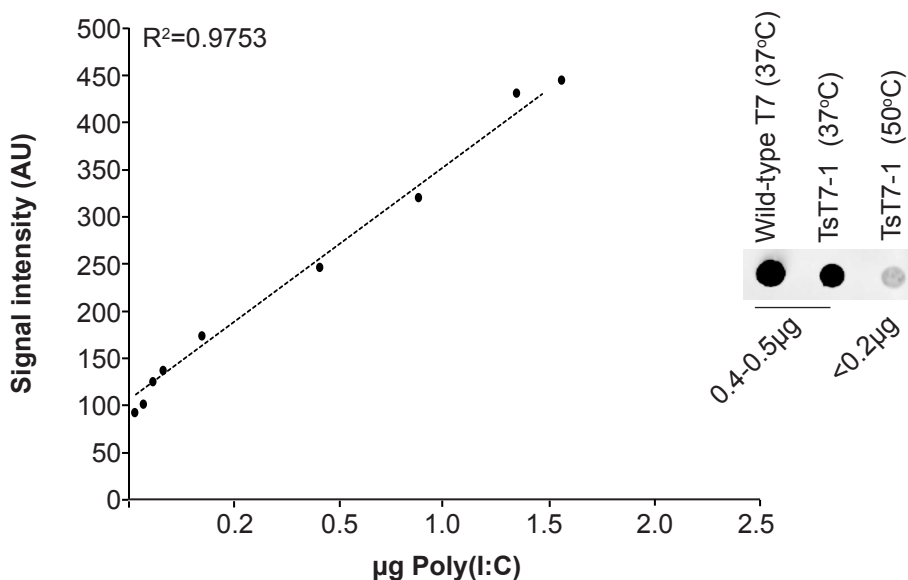

Supplement: Supplemental_Fig_S1.pdf [file Supplemental_Fig_S1.pdf]
