# Supplementary material
Source: HighWire-hosted journal article supplement (doi:10.1101/rna.073858.119)

## Supplemental\_Figure\_S3

**Intact mass spectrometry analyses of *in vitro* transcription reaction with IVT Template short-2 after RNase III treatment demonstrating reduction in the extended byproducts.** *In vitro* transcription reactions were performed with wild-type T7 RNA polymerase at 37°C for 1 hour followed by RNase III treatment. RNase III treated samples were then subjected to intact mass spectrometry analyses.

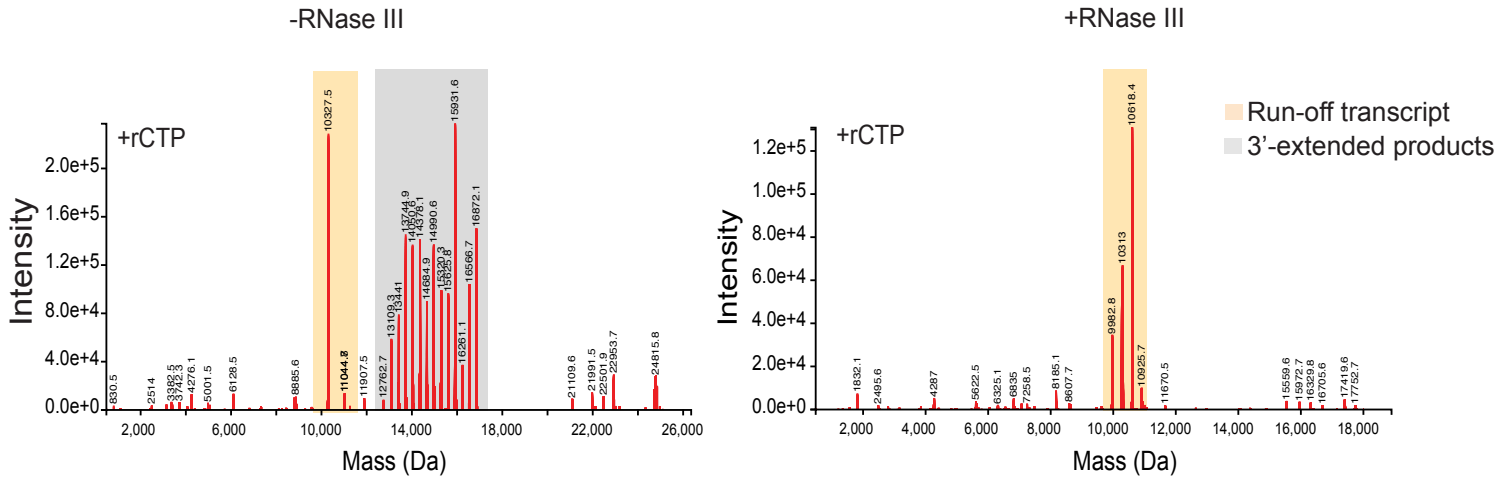

Supplement: Supplemental_Fig_S3.pdf [file Supplemental_Fig_S3.pdf]
