# Supplementary material
Source: HighWire-hosted journal article supplement (doi:10.1101/rna.073858.119)

# Supplemental\_Figure\_S4

**Coomassie-stained SDS polyacrylamide gel showing purity of the RNA polymerase (RNAP) preparations.** Equal amounts of protein (wild-type T7 RNAP and TsT7-1 and TsT7-2) were analyzed on an SDS-polyacrylamide gel followed by Coomassie staining.

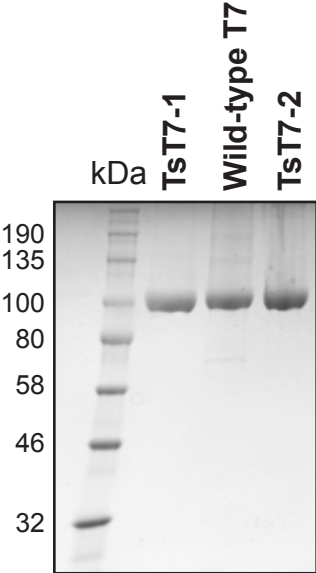

Supplement: Supplemental_Fig_S4.pdf [file Supplemental_Fig_S4.pdf]
