# Supplementary material
Source: HighWire-hosted journal article supplement (doi:10.1101/rna.073858.119)

## Supplemental\_Figure\_S5

**Bioanalyzer trace demonstrating integrity of the CLuc RNA when *in vitro* transcription was performed at 50°C with TsT7-1 and TsT7-2.** *In vitro* transcription reactions were performed with either wild-type T7 at 37°C or TsT7-1 and TsT7-2 at 50°C followed by column purification (MEGAclean™ Transcription Clean-Up Kit) and analysis on Agilent 2100 Bioanalyzer.

Wild-type T7 RNAP (37°C)

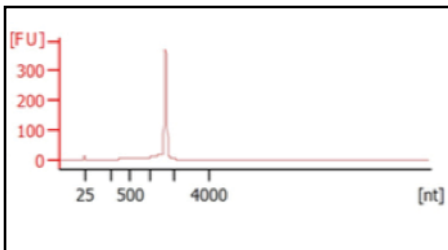

TsT7-1 RNAP (50°C)

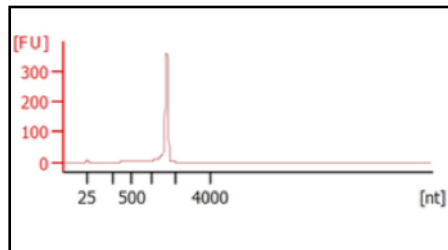

TsT7-2 RNAP (50°C)

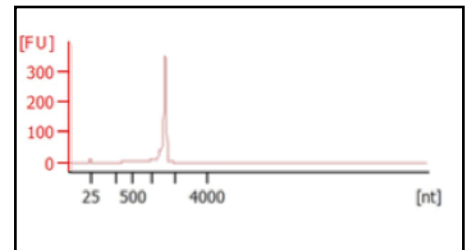

Supplement: Supplemental_Fig_S5.pdf [file Supplemental_Fig_S5.pdf]
