# Supplementary material
Source: HighWire-hosted journal article supplement (doi:10.1101/rna.073858.119)

## Supplemental\_Figure\_S6

### dsRNA immunoblot showing reduction of 3'-extended dsRNA byproducts with TsT7-2.

Immunoblot using dsRNA antibody J2 on *in vitro* transcription reactions with CLuc template using TsT7-2 at 37°C or 50°C for 1 hour. *In vitro* transcription reactions using IVT Template short 1 (30 bp) ran on denaturing gels under standard conditions (four rNTPs), and under conditions where one rNTP is omitted to prevent formation of the dsRNA products (-rUTP).

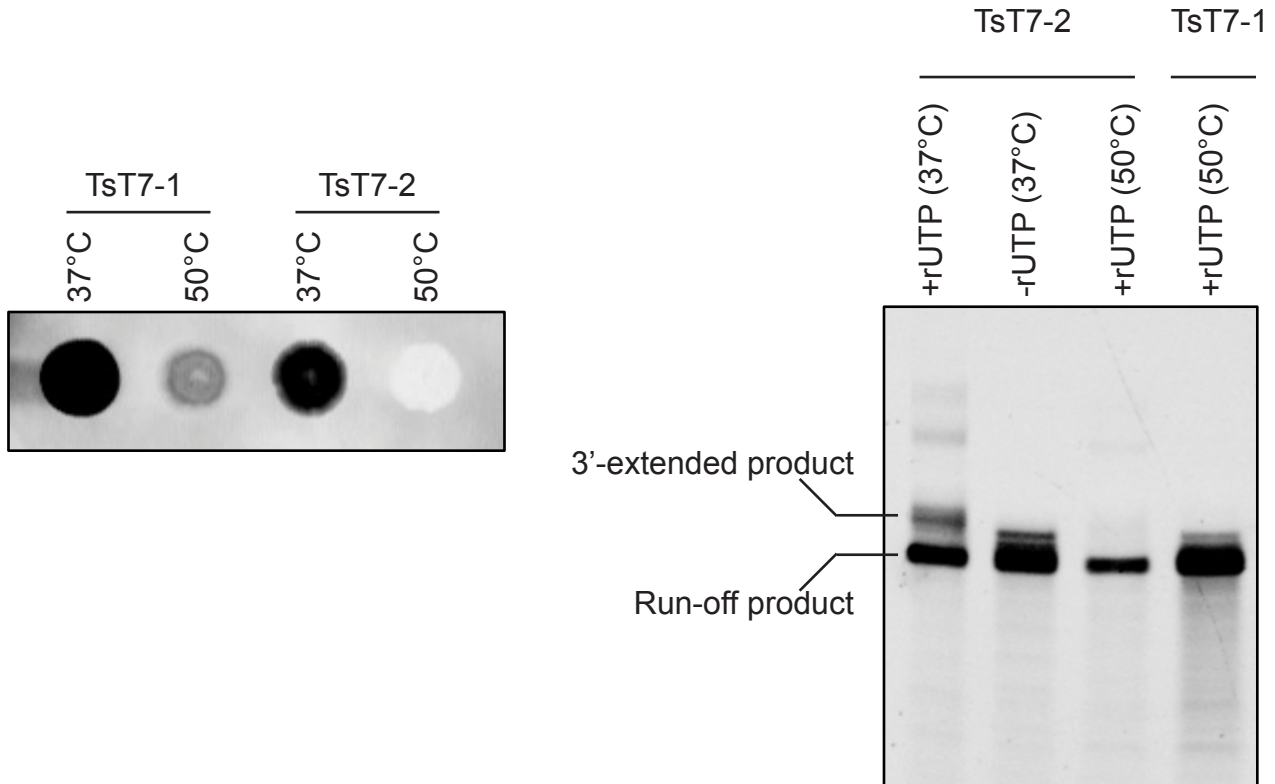

Supplement: Supplemental_Fig_S6.pdf [file Supplemental_Fig_S6.pdf]
