# Supplementary material
Source: HighWire-hosted journal article supplement (doi:10.1101/rna.073858.119)

## Supplemental\_Figure\_S7

**dsRNA immunoblot demonstrating reduction in signal when *in vitro* transcription is performed with TsT7-1 and TsT7-2 at 50°C for multiple templates.** Immunoblot on *in vitro* transcription reactions performed on templates with varying length and sequence at the 3'-end with J2 antibody (1:5000; Scicons). *In vitro* transcription reactions were performed with either wild-type T7 RNAP at 37°C, TsT7-1 at 50°C or TsT7-2 at 50°C.

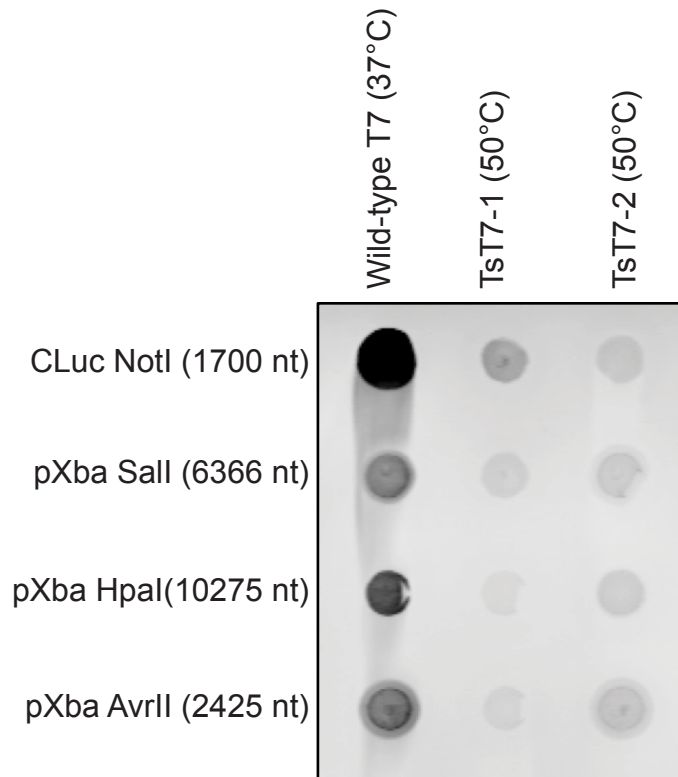

Supplement: Supplemental_Fig_S7.pdf [file Supplemental_Fig_S7.pdf]
