# Supplementary material
Source: HighWire-hosted journal article supplement (doi:10.1101/rna.073858.119)

## Supplemental\_Figure\_S8

**Truncation of the 3' end of the 512B DNA template results in reduction of the antisense RNA byproduct formation.** Immunoblot (with J2 antibody; 1:5000; Scicons) and native gel electrophoresis analyses of *in vitro* transcription reactions performed on 512B template with 3'-end truncations (50 and 200 base pairs). *In vitro* transcription reactions were performed with TsT7-1 at 37°C or 50°C.

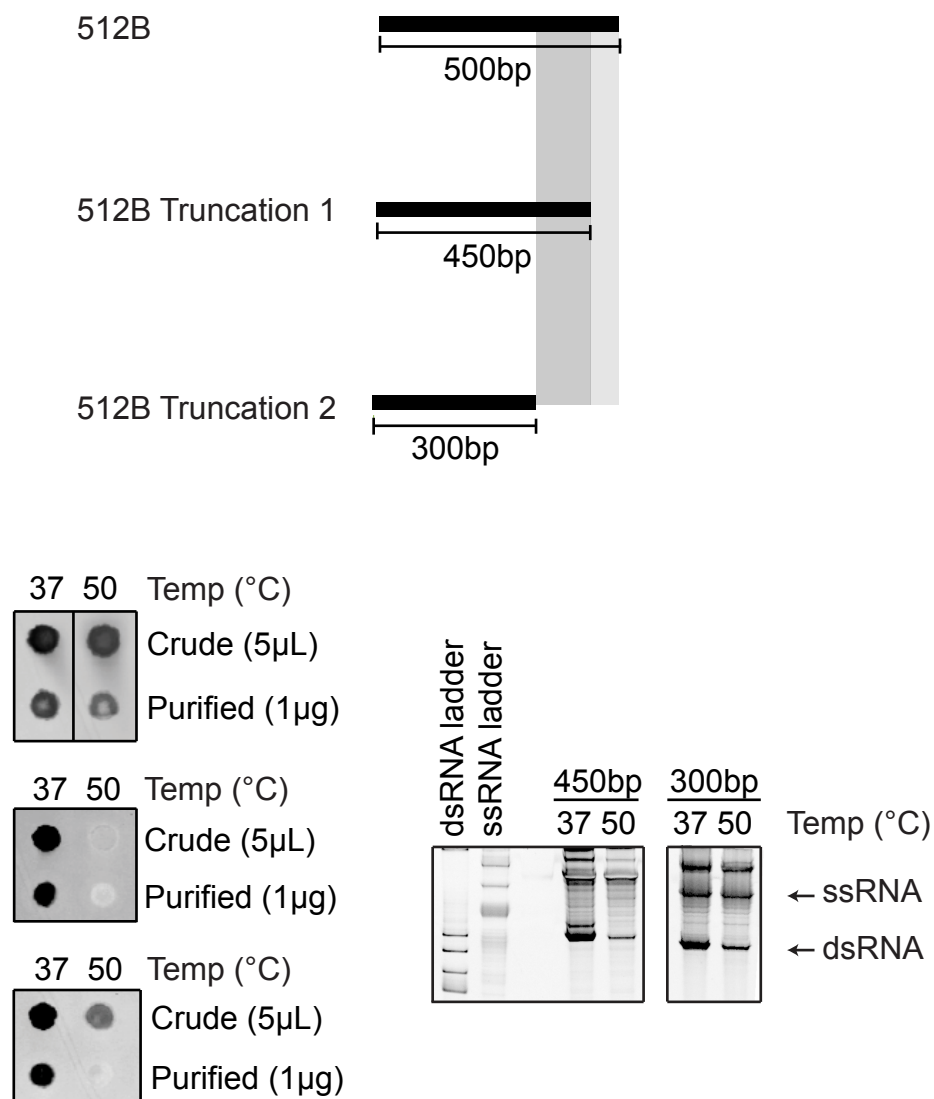

Supplement: Supplemental_Fig_S8.pdf [file Supplemental_Fig_S8.pdf]
