# Supplementary material
Source: HighWire-hosted journal article supplement (doi:10.1101/rna.073858.119)

## Supplemental\_Figure\_S9

**Intact mass spectrometry analysis of IVT Template short-1 with poly-A tail.** *In vitro* transcription reactions were performed with wild-type T7 RNAP at 37°C for one hour on IVT Template short-1 templates with a poly-A tail (10 base pairs).

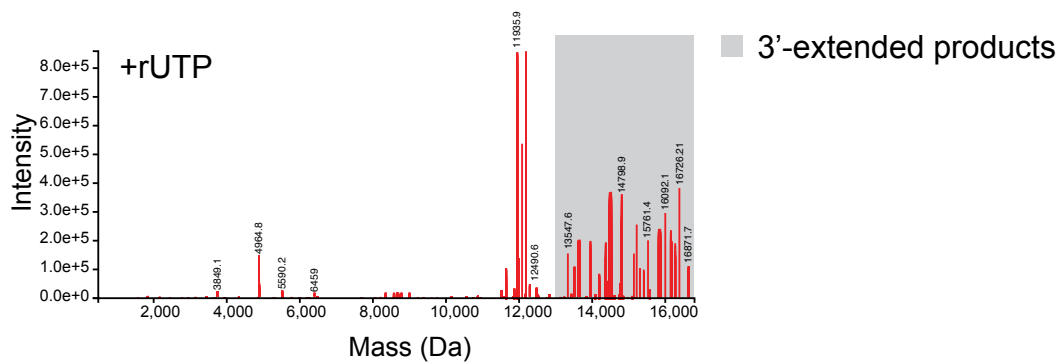

Supplement: Supplemental_Fig_S9.pdf [file Supplemental_Fig_S9.pdf]
