# Supplementary material
Source: HighWire-hosted journal article supplement (doi:10.1101/rna.073858.119)
Supplement: Supplemental_Table_S1.docx [file Supplemental_Table_S1.docx]

**Supplemental_Table_S1: Oligonucleotide sequences used for *in vitro* transcription of short RNA.** T7 promoter sequences are underlined.

|  | **Sequence (5’ – 3’)** |
| --- | --- |
| IVT Template short 1 Forward | CAGTAATACGACTCACTATAggcagcagcagcagcagcagcagcag |
| IVT Template short 1 Reverse | ctgctgctgctgctgctgctgctgccTATAGTGAGTCGTATTACTG |
| IVT Template short 2 Forward | CAGTAATACGACTCACTATAgatgatgatgatgatgatgatgatgatgat |
| IVT Template short 2 Reverse | atcatcatcatcatcatcatcatcatcatcTATAGTGAGTCGTATTACTG |
| 512B original | TAATACGACTCACTATAGGGAGAAGCTCTCTTACACCTGATTCATTTCCATTGTTTTCTGCAGCAGCAATCCGGTTTCTGTCTTCAATTGTCAACAGTTCCTCCTCCATGCACTTATCCAAGACGTCTCTAACTAGAAGCTTGTCCACCAGAGTGGGCTGAAGGAGGTTCAGCAGTTGGAGATATTCATCATGAGCGTTCTCAAACGATGGAGAGGGCAAGTCCGTGAGCTCAGGGTTCATGTAGCGGGCGGCCAGAGGGCTGCCGGTTCTCCGGAGGGCCTCCACGAATTCCCGAGTCCAACCAAGGTGCCAGACTCCCTTCTCCAAGGTGCTCAGCAGCAGTTCAACTGCCTGCATGTTCCCGGAGGTGGCGACTGTCCTCTGAATCTGCTCCTTCACCTCTGCAGGCAGAAAGGTCAGGTAGTCCAGCACAGGCTCCACCTGGATGTACATTTTCACCCTGGCCCTGAAGCACGAGATGAGATAGCGGAAATTCTCGTCTGTGGAATACCCATTCGACATTCTCCC |
| 512B-A | TAATACGACTCACTATAGGGAGAAGCTCTCTTACACCTGATTCATTTCCATTGTTTTCTGCAGCAGCAATCCGGTTTCTGTCTTCAATTGTCAACAGTTCCTCCTCCATGCACTTATCCAAGACGTCTCTAACTAGAAGCTTGTCCACCAGAGTGGGCTGAAGGAGGTTCAGCAGTTGGAGATTGGAATACCCATTCGACATTCTCCCATTCATCATGAGCGTTCTCAAACGATGGAGAGGGCAAGTCCGTGAGCTCAGGGTTCATGTAGCGGGCGGCCAGAGGGCTGCCGGTTCTCCGGAGGGCCTCCACGAATTCCCGAGTCCAACCAAGGTGCCAGACTCCCTTCTCCAAGGTGCTCAGCAGCAGTTCAACTGCCTGCATGTTCCCGGAGGTGGCGACTGTCCTCTGAATCTGCTCCTTCACCTCTGCAGGCAGAAAGGTCAGGTAGTCCAGCACAGGCTCCACCTGGATGTACATTTTCACCCTGGCCCTGAAGCACGAGATGAGATAGCGGAAATTCTCGTCTG |
| 512B-B | TAATACGACTCACTATAGGGAGAAGCTCTCTTACACCTGATTCATTTCCATTGTTTTCTGCAGCAGCAATCCGGTTTCTGTCTTCAATTGTCAACAGTTCCTCCTCCATGCACTTATCCAAGACGTCTCTAACTAGAAGCTTGTCCACCAGAGTGGGCTGAAGGAGGTTCAGCAGTTGGAGATATTCATCATGAGCGTTCTCAAACGATGGATGGAATACCCATTCGACATTCTCCCGAGGGCAAGTCCGTGAGCTCAGGGTTCATGTAGCGGGCGGCCAGAGGGCTGCCGGTTCTCCGGAGGGCCTCCACGAATTCCCGAGTCCAACCAAGGTGCCAGACTCCCTTCTCCAAGGTGCTCAGCAGCAGTTCAACTGCCTGCATGTTCCCGGAGGTGGCGACTGTCCTCTGAATCTGCTCCTTCACCTCTGCAGGCAGAAAGGTCAGGTAGTCCAGCACAGGCTCCACCTGGATGTACATTTTCACCCTGGCCCTGAAGCACGAGATGAGATAGCGGAAATTCTCGTCTG |
| 512B-C | TAATACGACTCACTATAGGGAGAAGCTCTCTTACACCTGATTCATTTCCATTGTTTTCTGCAGCAGCAATCCGGTTTCTGTCTTCAATTGTCAACAGTTCCTCCTCCATGCACTTATCCAAGACGTCTCTAACTAGAAGCTTGTCCACCAGAGTGGGCTGAAGGAGGTTCAGCAGTTGGAGATATTCATCATGAGCGTTCTCAAACGATGGAGAGGGCAAGTCCGTGAGCTCAGGGTTCATGTAGCGGGCGGCCAGAGGGCTGCCGGTTCTCCGGAGGGCCTCCACGAATTCCCGAGTCCAACCAAGGTGCCTGGAATACCCATTCGACATTCTCCCAGACTCCCTTCTCCAAGGTGCTCAGCAGCAGTTCAACTGCCTGCATGTTCCCGGAGGTGGCGACTGTCCTCTGAATCTGCTCCTTCACCTCTGCAGGCAGAAAGGTCAGGTAGTCCAGCACAGGCTCCACCTGGATGTACATTTTCACCCTGGCCCTGAAGCACGAGATGAGATAGCGGAAATTCTCGTCTG |
| 512B-D | TAATACGACTCACTATAGGGAGAAGCTCTCTTACACCTGATTCATTTCCATTGTTTTCTGCAGCAGCAATCCGGTTTCTGTCTTCAATTGTCAACAGTTCCTCCTCCATGCACTTATCCAAGACGTCTCTAACTAGAAGCTTGTCCACCAGAGTGGGCTGAAGGAGGTTCAGCAGTTGGAGATATTCATCATGAGCGTTCTCAAACGATGGAGAGGGCAAGTCCGTGAGCTCAGGGTTCATGTAGCGGGCGGCCAGAGGGCTGCCGGTTCTCCGGAGGGCCTCCACGAATTCCCGAGTCCAACCAAGGTGCCAGACTCCCTTCTCCAAGGTGCTCAGCAGCAGTTCAACTGCCTGCATGTTCCCGGAGGTGGCGACTGTCCTCTGAATCTGCTCCTTCACCTCTGCAGGCAGAAAGGTCAGGTAGTGGAATACCCATTCGACATTCTCCCTCCAGCACAGGCTCCACCTGGATGTACATTTTCACCCTGGCCCTGAAGCACGAGATGAGATAGCGGAAATTCTCGTCTG |
| 512B::Cluc | TAATACGACTCACTATAGGGAGAAGCTCTCTTACACCTGATTCATTTCCATTGTTTTCTGCAGCAGCAATCCGGTTTCTGTCTTCAATTGTCAACAGTTCCTCCTCCATGCACTTATCCAAGACGTCTCTAACTAGAAGCTTGTCCACCAGAGTGGGCTGAAGGAGGTTCAGCAGTTGGAGATATTCATCATGAGCGTTCTCAAACGATGGAGAGGGCAAGTCCGTGAGCTCAGGGTTCATGTAGCGGGCGGCCAGAGGGCTGCCGGTTCTCCGGAGGGCCTCCACGAATTCCCGAGTCCAACCAAGGTGCCAGACTCCCTTCTCCAAGGTGCTCAGCAGCAGTTCAACTGCCTGCATGTTCCCGGAGGTGGCGACTGTCCTCTGAATCTGCTCCTTCACCTCTGCAGGCAGAAAGGTCAGGTAGTCCAGCACAGGCTCCACCTGGATGTACATTTTCACCCTGGCCCTGAAGCACGAGATGAGATAGCGGAAATTCTCGTCTGTGGAATACCCATTCGACATTCTCCCGTGTGTCTAGAAATAATTCTTACTGT |
| 512B Truncation 1 | TAATACGACTCACTATAGGGAGAAGCTCTCTTACACCTGATTCATTTCCATTGTTTTCTGCAGCAGCAATCCGGTTTCTGTCTTCAATTGTCAACAGTTCCTCCTCCATGCACTTATCCAAGACGTCTCTAACTAGAAGCTTGTCCACCAGAGTGGGCTGAAGGAGGTTCAGCAGTTGGAGATATTCATCATGAGCGTTCTCAAACGATGGAGAGGGCAAGTCCGTGAGCTCAGGGTTCATGTAGCGGGCGGCCAGAGGGCTGCCGGTTCTCCGGAGGGCCTCCACGAATTCCCGAGTCCAACCAAGGTGCCAGACTCCCTTCTCCAAGGTGCTCAGCAGCAGTTCAACTGCCTGCATGTTCCCGGAGGTGGCGACTGTCCTCTGAATCTGCTCCTTCACCTCTGCAGGCAGAAAGGTCAGGTAGTCCAGCACAGGCTCCACCTGGATGTACATTTTCACCCTGGC |
| 512B Truncation 2 | TAATACGACTCACTATAGGGAGAAGCTCTCTTACACCTGATTCATTTCCATTGTTTTCTGCAGCAGCAATCCGGTTTCTGTCTTCAATTGTCAACAGTTCCTCCTCCATGCACTTATCCAAGACGTCTCTAACTAGAAGCTTGTCCACCAGAGTGGGCTGAAGGAGGTTCAGCAGTTGGAGATATTCATCATGAGCGTTCTCAAACGATGGAGAGGGCAAGTCCGTGAGCTCAGGGTTCATGTAGCGGGCGGCCAGAGGGCTGCCGGTTCTCCGGAGGGCCTCCACGAATTCCCGAGTCCAACCAAGGTGCCAGACTCCCTTCTCCAAGGTGCTCAGCAGCAGTTCAACTGCCTGCATGTTCC |
