# Supplementary material
Source: HighWire-hosted journal article supplement (doi:10.1101/rna.073858.119)
Supplement: Supplemental_Table_S2.docx [file Supplemental_Table_S2.docx]

**Supplemental_Table_S2: RNA yield from *in vitro* transcription reactions with wild-type or TsT7-1 RNA polymerase.** Data from one representative experiment is denoted.

| Template | RNA polymerase | Temperature | Yield  (ng/uL) |
| --- | --- | --- | --- |
| CLuc (1700bp) | Wild-type | 37°C | 2278 |
|  | Wild-type | 50°C | 39 |
|  | TsT7-1 | 37°C | 2126 |
|  | TsT7-1 | 50°C | 3179 |
|  |  |  |  |
| GFP (761bp) | Wild-type | 37°C | 1761 |
|  | Wild-type | 50°C | 51 |
|  | TsT7-1 | 37°C | 1820 |
|  | TsT7-1 | 50°C | 1933 |
